# Supplementary material for: Axial Growth Driven by Physical Development and Myopia among Children: A Two Year Cohort Study
Source: MDPI journal article supplement (doi:10.3390/jcm11133642), 2022-06-23
Supplement: s1 [file s1]

## Supplementary Tables

**Table S1. Sample composition based on different conditions**

| <b>Grade</b> | <b>Screening<br/>sample, N</b> | <b>Children with<br/>cycloplegic refraction,<br/>n (%)</b> | <b>Children with cycloplegic<br/>refraction and measure of<br/>axial length, n (%)</b> | <b>Children without<br/>abnormal ocular<br/>findings*</b> |
|--------------|--------------------------------|------------------------------------------------------------|----------------------------------------------------------------------------------------|-----------------------------------------------------------|
| G0           | 1,433                          | 1,431 (99.9)                                               | 1,406 (98.1)                                                                           | 1,366 (95.3)                                              |
| G1           | 1,561                          | 1,561 (100)                                                | 1,553 (99.5)                                                                           | 1,461 (93.6)                                              |
| G4           | 2,671                          | 2,671 (100)                                                | 2,615 (97.9)                                                                           | 2,333 (87.3)                                              |
| G7           | 1,385                          | 1,385 (100)                                                | 1,380 (99.6)                                                                           | 1,193 (86.1)                                              |
| Total        | 7,050                          | 7,048 (99.97)                                              | 6,954 (98.6)                                                                           | 6,353 (90.1)                                              |

\* Abnormal ocular characteristics included abnormal ocular findings, astigmatism greater than 5.0D of cylinder or high myopia ( $SER \leq -5.0D$ ).

G0: kindergarten; G1: first year of primary school; G4: fourth year of primary school; G7: first year of junior high school.

**Table S2. Baseline characteristics of the participants (n=6353)**

|               | <b>n (%)</b> | <b>Age (year)</b><br><b>Mean (SD)</b> | <b>SER (D)</b><br><b>Median (IQR)</b> | <b>AL (mm)</b><br><b>Mean (SD)</b> |
|---------------|--------------|---------------------------------------|---------------------------------------|------------------------------------|
| <b>G0</b>     |              |                                       |                                       |                                    |
| <b>Male</b>   | 706 (51.68)  | 3.68 (0.33)                           | 1.375 (1.125 – 1.625)                 | 22.29 (0.58)                       |
| <b>Female</b> | 660 (48.32)  | 3.69 (0.36)                           | 1.375 (1.000 – 1.750)                 | 21.75 (0.57)                       |
| <b>All</b>    | 1366         | 3.68 (0.35)                           | 1.375 (1.125 – 1.750)                 | 22.04 (0.63)                       |
| <b>G1</b>     |              |                                       |                                       |                                    |
| <b>Male</b>   | 816 (55.85)  | 6.81 (0.35)                           | 1.250 (0.875 – 1.500)                 | 22.85 (0.63)                       |
| <b>Female</b> | 645 (44.15)  | 6.78 (0.35)                           | 1.250 (0.875 – 1.625)                 | 22.32 (0.62)                       |
| <b>All</b>    | 1461         | 6.80 (0.35)                           | 1.250 (0.875 – 1.625)                 | 22.62 (0.68)                       |
| <b>G4</b>     |              |                                       |                                       |                                    |
| <b>Male</b>   | 1263 (54.14) | 9.56 (0.41)                           | 0.625 (0.125 – 1.000)                 | 23.51 (0.79)                       |
| <b>Female</b> | 1070 (45.86) | 9.54 (0.40)                           | 0.625 (-0.125 – 0.875)                | 23.01 (0.79)                       |
| <b>All</b>    | 2333         | 9.55 (0.41)                           | 0.625 (0.000 – 1.000)                 | 23.28 (0.83)                       |
| <b>G7</b>     |              |                                       |                                       |                                    |
| <b>Male</b>   | 651 (54.57)  | 12.6 (0.41)                           | -0.125 (-1.875 – 0.625)               | 24.23 (1.05)                       |
| <b>Female</b> | 542 (45.43)  | 12.5 (0.39)                           | -1.000 (-2.500 – 0.125)               | 23.92 (0.92)                       |
| <b>All</b>    | 1193         | 12.6 (0.40)                           | -0.500 (-2.250 – 0.375)               | 24.08 (1.00)                       |

**Table S3. AL trend across height levels by age group, among PNM participants**

| Age (y)   | Low height* |              | Middle height |              | High height |              | p value |
|-----------|-------------|--------------|---------------|--------------|-------------|--------------|---------|
|           | n           | Mean (SD)    | n             | Mean (SD)    | n           | Mean (SD)    |         |
| <b>3</b>  | 72          | 21.96 (0.54) | 70            | 22.10 (0.61) | 57          | 22.16 (0.56) | 0.112   |
| <b>4</b>  | 276         | 21.99 (0.65) | 398           | 22.19 (0.59) | 276         | 22.25 (0.67) | <0.001  |
| <b>5</b>  | 438         | 22.22 (0.66) | 399           | 22.38 (0.67) | 209         | 22.49 (0.64) | <0.001  |
| <b>6</b>  | 347         | 22.41 (0.67) | 355           | 22.56 (0.64) | 325         | 22.65 (0.68) | <0.001  |
| <b>7</b>  | 397         | 22.55 (0.65) | 511           | 22.74 (0.63) | 508         | 22.82 (0.67) | <0.001  |
| <b>8</b>  | 452         | 22.78 (0.70) | 348           | 22.89 (0.62) | 273         | 23.03 (0.69) | <0.001  |
| <b>9</b>  | 455         | 22.87 (0.67) | 413           | 23.00 (0.66) | 430         | 23.28 (0.69) | <0.001  |
| <b>10</b> | 344         | 23.03 (0.69) | 297           | 23.18 (0.71) | 356         | 23.43 (0.70) | <0.001  |
| <b>11</b> | 360         | 23.20 (0.74) | 289           | 23.36 (0.71) | 340         | 23.52 (0.73) | <0.001  |
| <b>12</b> | 114         | 23.21 (0.68) | 103           | 23.42 (0.76) | 131         | 23.61 (0.73) | <0.001  |
| <b>13</b> | 80          | 23.41 (0.97) | 85            | 23.26 (0.74) | 120         | 23.70 (0.64) | <0.001  |
| <b>14</b> | 124         | 23.41 (0.64) | 113           | 23.64 (0.79) | 91          | 23.80 (0.70) | <0.001  |
| <b>15</b> | 22          | 23.57 (0.84) | 18            | 23.59 (0.59) | 2           | 24.07 (0.01) | 0.684   |

\*: Divided into tertiles based on body height;

PNM: persistent non-myopia; p value: AL change among the three different body height tertiles.

## Supplement Figures

Figure S1 Flowchart

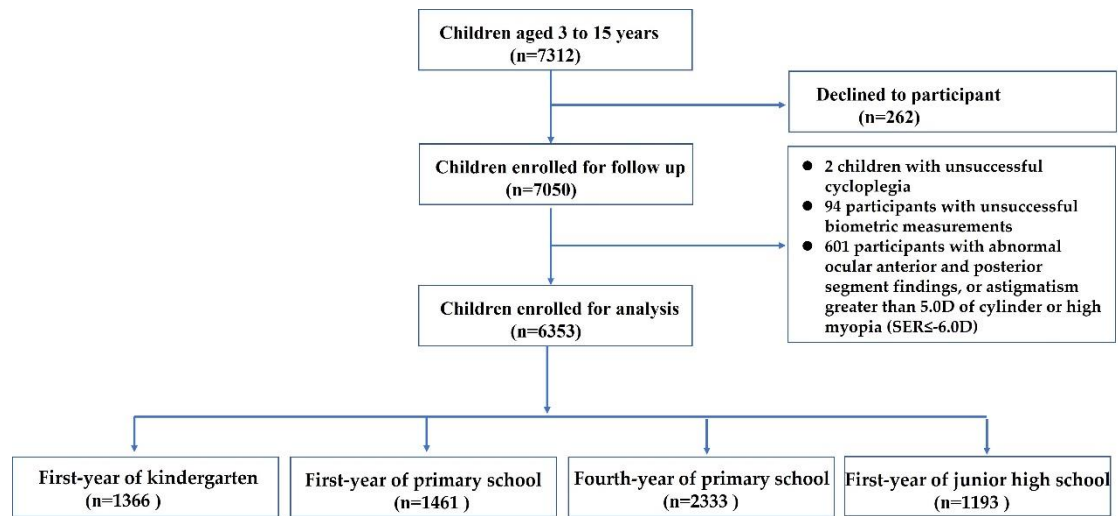

Figure S2

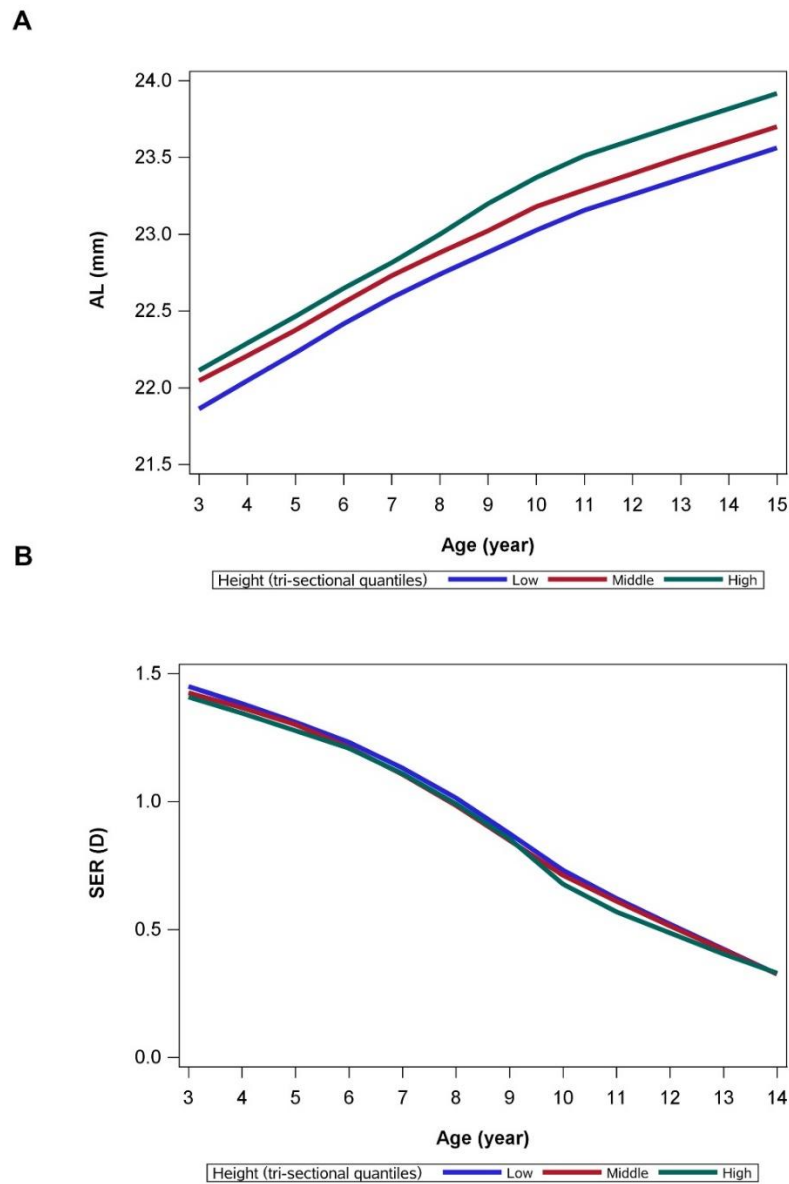

**Figure S2** Axial length (AL) and spherical equivalent refraction (SER) change in height change in tertiles from 3 to 14 years of age in persistent non-myopia. A: the change of AL. B: the change of SER. Data were plotted pooling all the participants with two-year follow up.
